# Supplementary material for: Mutation and Interaction Analysis of the Glycoprotein D and L and Thymidine Kinase of Pseudorabies Virus
Source: MDPI journal article supplement (doi:10.3390/ijms231911597), 2022-09-30
Supplement: s1 [file s1]

**Supplemental Table S1 Information of Pseudorabies virus isolates/strains obtained from NCBI.**

| Isolate/strain | Accession | Length | Country        | Host                   | Collection Date | gD       | gL       | TK       |
|----------------|-----------|--------|----------------|------------------------|-----------------|----------|----------|----------|
| Bartha         | JF797217  | 137764 | Hungary        | Sus scrofa             | 2011-01         | AEM63974 | AEM64000 | AEM63956 |
| MY-1           | AP018925  | 143277 | Japan          | Canis lupus familiaris | 2015-03         | BBG06543 | BBG06537 | BBG06514 |
| BJ/YT          | KC981239  | 120534 | China          | Canis lupus familiaris | 2012-10         | AGW01147 | AGW01143 | AGW01123 |
| hSD-1/2019     | MT468550  | 143905 | China          | Homo sapiens           | 2019            | QMP81449 | QMP81443 | QMP81420 |
| DL14/08        | KU360259  | 143254 | China          | Mustela lutreola       | 2014-08         | AMO42782 | AMO42776 | AMO42753 |
| RC1            | LC342744  | 141757 | Japan          | Procyon lotor          | 2016-02-10      | BBC15291 | BBC15285 | BBC15262 |
| SD18           | MT949536  | 143418 | China          | Sus scrofa             | 2020-08         | QPF49835 | QPF49862 | QPF49817 |
| HuBXY/2018     | MT468549  | 144795 | China          | Sus scrofa             | 2018            | QMP81381 | QMP81375 | QMP81352 |
| HLJ-2013       | MK080279  | 142560 | China          | Sus scrofa             | 2013-08         | QCT05844 | QCT05838 | QCT05815 |
| Ea (Hubei)     | KX423960  | 141818 | China          | Sus scrofa             | 1993            | ARJ55492 | ARJ5547  | ARJ55464 |
| LA             | KU552118  | 141428 | China          | Sus scrofa             | 1997-03-01      | APT68478 | APT68472 | APT68450 |
| Fa             | KM189913  | 141930 | China          | Sus scrofa             | 2012-08-06      | AKG94093 | AKG94088 | AKG94066 |
| NIA3           | KU900059  | 142228 | United Kingdom | Sus scrofa             |                 | AMR55963 | AMR55957 | AMR55934 |
| SC             | KT809429  | 142825 | China          | Sus scrofa             | 1986            | AML81176 | AML81169 | AML81146 |
| Becker         | JF797219  | 141113 | USA            | Sus scrofa             |                 | AEM64108 | AEM64138 | AEM64090 |
| PRV-MdBio      | LT934125  | 142922 | Serbia         | Sus scrofa domesticus  | 2015-09         | SOF05977 | SOF05971 | SOF05948 |
| Kolchis        | KT983811  | 141542 | Greece         | Sus scrofa domesticus  | 2010            | ALO75798 | ALO75773 | ALO75769 |
